# Supplementary material for: Goiter and its associated factors among primary school children aged 6-12 years in Anchar district, Eastern Ethiopia
Source: PLOS journal article supplement (doi:10.1371/journal.pone.0214927), 2019-04-04
Supplement: S2 (10.1371/journal.pone.0214927.s002) [file journal.pone.0214927.s002]

## English version of the questionnaire and checklist

Questionnaire identification number: \_\_\_\_\_

Date of interview (DD/MM/YYYY): \_\_\_\_/\_\_\_\_/\_\_\_\_

### Part-I: Socioeconomic and demographic characteristics of children and their parents/guardians

| S.No | Question                                | Response                                                                                                                                |
|------|-----------------------------------------|-----------------------------------------------------------------------------------------------------------------------------------------|
| 101  | Child age (in completed years)          | _____ years                                                                                                                             |
| 102  | Child age (in completed months)         | _____ months                                                                                                                            |
| 103  | Child sex                               | 1. Male<br>2. Female                                                                                                                    |
| 104  | Child religion                          | 1. Muslim<br>2. Orthodox<br>3. Protestant<br>4. Other (specify)...                                                                      |
| 105  | Ecological zone                         | 1. Kolla<br>2. Woinadega<br>3. Dega                                                                                                     |
| 106  | Residence                               | 1. Urban<br>2. Rural                                                                                                                    |
| 107  | Total family/household size (in number) | _____                                                                                                                                   |
| 108  | Marital Status of mother or caregiver   | 1. Single<br>2. Married<br>3. Separated<br>4. Divorced<br>5. Widowed                                                                    |
| 109  | Age of mother                           | _____ years                                                                                                                             |
| 110  | Maternal educational status             | 1. Unable to read and write<br>2. Able to read and write<br>3. Primary (grade 1-8)<br>4. Secondary (grade 9-12)<br>5. College and above |
| 111  | Maternal occupation                     | 1. Housewife<br>2. Government employee<br>3. Private employee/NGO<br>4. Day laborer<br>5. Unemployed<br>6. Other (specify) _____        |

|     |                                                                                            |                                                                                                                                         |
|-----|--------------------------------------------------------------------------------------------|-----------------------------------------------------------------------------------------------------------------------------------------|
| 112 | Educational status of father                                                               | 1. Unable to read and write<br>2. Able to read and write<br>3. Primary (grade 1-8)<br>4. Secondary (grade 9-12)<br>5. College and above |
| 113 | Do you have a radio?                                                                       | 1. Yes<br>2. No                                                                                                                         |
| 114 | Whose property is the house in which you live?                                             | 1. Our own<br>2. Rent<br>3. Free housing<br>4. Others (specify)                                                                         |
| 115 | Does your household own any agricultural land?                                             | 1. Yes<br>2. No                                                                                                                         |
| 116 | Does your household own the following domestic animals? (More than one answer is possible) | 1. Cows/bulls/oxen_____<br>2. Horse/donkey/mules_____<br>3. Goats_____<br>4. Sheep_____<br>5. Chickens_____<br>6. Beehives_____         |
| 117 | Do you have a garden?                                                                      | 1. Yes<br>2. No                                                                                                                         |
| 118 | What is the main source of your drinking water?                                            | 1. Tap water in the compound<br>2. Bono<br>3. River/pond<br>4. Well/spring<br>5. Other (specify) _____                                  |
| 119 | Does your household have latrine?                                                          | 1. Yes<br>2. No                                                                                                                         |
| 120 | What is the main roof material of your house?                                              | 1. Rudimentary (Grass, Plastic sheeting)<br>2. Finished roof (corrugated iron)<br>3. No roof<br>4. Other (specify) _____                |

## **Part-II: Maternal /Caretaker's awareness or information on health and nutrition**

| <b>S.No</b> | <b>Question</b>                                   | <b>Response</b> |
|-------------|---------------------------------------------------|-----------------|
| 201         | Did you have information on health and nutrition? | 1.Yes<br>2.No   |
| 202         | Do you know what balanced/ diversified diet is?   | 1.Yes<br>2.No   |
| 203         | Do you know iodine rich foods?                    | 1.Yes           |

|     |                                                                    |                                                                                                                                                      |
|-----|--------------------------------------------------------------------|------------------------------------------------------------------------------------------------------------------------------------------------------|
|     |                                                                    | 2.No                                                                                                                                                 |
| 204 | Have you ever heard of iodized salt?                               | 1.Yes<br>2.No                                                                                                                                        |
| 205 | Do you think every salt contains iodine?                           | 1. Yes<br>2. No                                                                                                                                      |
| 206 | Do you buy and use iodized salt for your family?                   | 1. Yes<br>2. No<br>3. Do not know                                                                                                                    |
| 207 | Have you heard of goiter?                                          | 1. Yes<br>2. No                                                                                                                                      |
| 208 | What are the major causes of goiter?                               | 1. Evil eye/evil spirit<br>2. Not eating adequate food<br>3. Drinking dirty water<br>4. Curse through/from family<br>5. I don't know                 |
| 209 | What are the food sources of iodine, if any?                       | 1. Cereals<br>2. Fish/foods produced in sea area<br>3. Iodized salt<br>4. I don't know                                                               |
| 210 | How can goiter be prevented?<br>(More than one answer is possible) | 1. Eating seafood<br>2. Eating iodized salt<br>3. Eating fish<br>4. Eating egg<br>5. Drinking holy water<br>6. Tattooing<br>7. Other (specify) _____ |

### Part-III: Feeding pattern/habit of children

| S.No | Question                                                                                   | Response                                                                                                                                                                                                                                                                                                                            |
|------|--------------------------------------------------------------------------------------------|-------------------------------------------------------------------------------------------------------------------------------------------------------------------------------------------------------------------------------------------------------------------------------------------------------------------------------------|
| 301  | How many meals does your child eat per day?                                                | _____meals                                                                                                                                                                                                                                                                                                                          |
| 302  | Last week, how frequently did your child take?<br>(Put your answers in the provided space) | 1. Milk _____<br>2. Meat _____<br>3. Egg _____<br>4. Vegetables/fruits such as oranges<br>after a meals _____<br>5. Green leafy vegetables _____<br>6. Legumes based food _____<br>7. Sweet potato _____<br>8. Savoy cabbage (Kurunba) _____<br>9. Cabbage ("gomman") _____<br>10. Sugar/honey _____<br>11. Oils/fats/butters _____ |
| 303  | What is the cabbage eating frequency of your child?                                        | 1. Every day<br>2. 3x/week                                                                                                                                                                                                                                                                                                          |

|  |  |                                                        |
|--|--|--------------------------------------------------------|
|  |  | 3. 2x/week<br>4. 1x/week<br>5. 1-2x/months<br>6. Never |
|--|--|--------------------------------------------------------|

#### Part-IV: Dietary diversity status of children

| S.No | Question/characteristic                                                                                                                                                                        | Response                         |
|------|------------------------------------------------------------------------------------------------------------------------------------------------------------------------------------------------|----------------------------------|
| 401  | Yesterday during the day and night, did your child eat any porridge or gruel made from grains and cereals?                                                                                     | 1.Yes<br>2.No<br>3.I do not know |
| 402  | Yesterday during the day and night, did your child eat bread, pasta, rice, noodles, biscuits, cookies or any other food made from oats, maize, barley, wheat, sorghum, millet, or other grain? | 1.Yes<br>2.No<br>3.I do not know |
| 403  | Yesterday during the day and night, did your child eat any food made from “teff”, like injera, “kita”, or porridge?                                                                            | 1.Yes<br>2.No<br>3.I do not know |
| 404  | Yesterday during the day and night, did your child eat any white potatoes, white yams, “kocho”, cassava, or any other foods made from roots?                                                   | 1.Yes<br>2.No<br>3.I do not know |
| 405  | Yesterday during the day and night, did your child eat any pumpkin, carrots, squash, or sweet potatoes that are yellow or orange inside?                                                       | 1.Yes<br>2.No<br>3.I do not know |
| 406  | Yesterday during the day and night, did your child eat any dark green, leafy vegetables like kale, spinach or amaranth leaves?                                                                 | 1.Yes<br>2.No<br>3.I do not know |
| 407  | Yesterday during the day and night, did your child eat any ripe mangoes or papayas?                                                                                                            | 1.Yes<br>2.No<br>3.I do not know |
| 408  | Yesterday during the day and night, did your child eat any other fruits or vegetables?                                                                                                         | 1.Yes<br>2.No<br>3.I do not know |
| 409  | Yesterday during the day and night, did your child eat any liver, kidney, heart or other organ meat?                                                                                           | 1.Yes<br>2.No<br>3.I do not know |
| 410  | Yesterday during the day and night, did your child eat any beef, fish, chicken or any other meat?                                                                                              | 1.Yes<br>2.No<br>3.I do not know |
| 411  | Yesterday during the day and night, did your child eat any egg?                                                                                                                                | 1.Yes<br>2.No<br>3.I do not know |
| 412  | Yesterday during the day and night, did your child eat any foods made from beans, peas, lentils or pulses?                                                                                     | 1.Yes<br>2.No<br>3.I do not know |
| 413  | Yesterday during the day and night, did your child eat any nuts or seeds such as peanuts, sesame or sunflower seeds?                                                                           | 1.Yes<br>2.No                    |

|     |                                                                                                         |                                  |
|-----|---------------------------------------------------------------------------------------------------------|----------------------------------|
|     |                                                                                                         | 3.I do not know                  |
| 414 | Yesterday during the day and night, did your child eat any cheese, yogurt, milk or other milk products? | 1.Yes<br>2.No<br>3.I do not know |
| 415 | Yesterday during the day and night, did your child eat any foods made with oil, fat, or butter?         | 1.Yes<br>2.No<br>3.I do not know |
| 416 | Yesterday during the day and night, did your child eat any other solid or semi-solid food?              | 1.Yes<br>2.No<br>3.I do not know |

**Part-V: Physical and laboratory examination checklist for children**

| S.No | Physical/laboratory Examination            | Result                                                       |
|------|--------------------------------------------|--------------------------------------------------------------|
| 601  | Weight (in kg)                             | _____kg                                                      |
| 602  | Height (in cm)                             | _____cm                                                      |
| 603  | Goiter examination                         | 1. Grade 0<br>2. Grade 1<br>3. Grade 2                       |
| 604  | Test the Salt with rapid test kit (in ppm) | 1. 0 ppm<br>2. 0-15 ppm<br>3. $\geq 15$ ppm<br>4. Not tested |

**Thank you!**

Name of the interviewer \_\_\_\_\_signature \_\_\_\_\_date\_\_\_\_\_

Name of the supervisor \_\_\_\_\_signature \_\_\_\_\_date\_\_\_\_\_
